# Supplementary material
Source: Springer Nature journal article supplement (https://www.springermedizin.de/resource/supplementary/12902_2014_312_MOESM4_ESM.pdf/9515938)

# Mixed genders

—■— control vehicle

---◆--- diabetes vehicle

—■— control vitamin

—◆— diabetes vitamin

a)

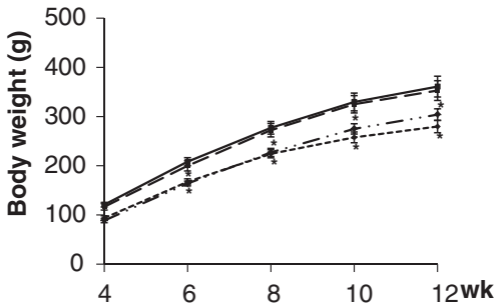

b)

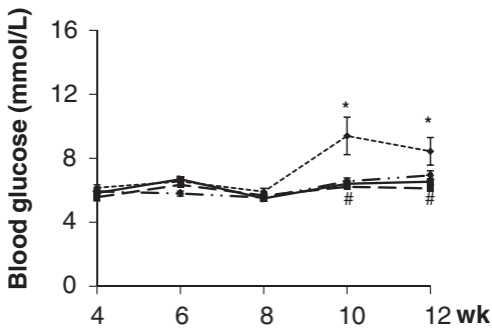

Supplement: MOESM4 [file 9515938]
